# Supplementary material
Source: publisher figshare collection journal article supplement (https://frontiersin.figshare.com/ndownloader/files/23868707)
Supplement: Supplementary file 1 [file 23868707]

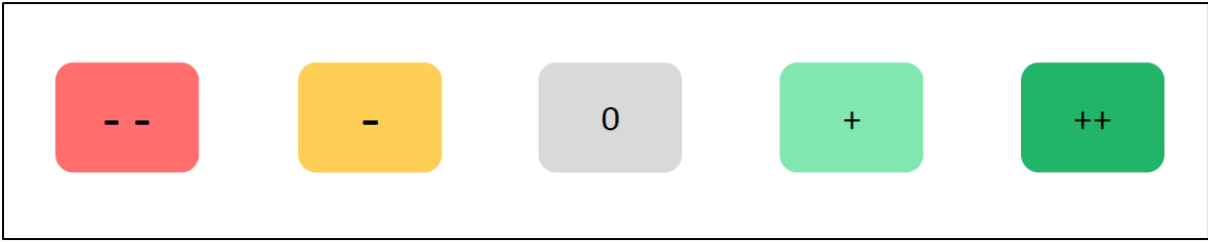

Supplementary Figure 1: A visual Likert Scale presented to respondents to quantify their opinions and responses to certain questions. The scale ranged from -2: More than a 50% decrease, -1: Up to a 50% decrease, 0: No impact, +1: Up to a 50% increase, +2: More than a 50% increase.
